# Supplementary material for: Tuning solvent strength can fractionate PVC into ultra-low molecular weight material with low dispersity
Source: Royal Society of Chemistry journal article supplement (doi:10.1039/d4lp00313f), 2025-01-01
Supplement: d4lp00313f2.zip [file d4lp00313f2.zip]

## Sheet: Sheet1
		PVC-ACE-MeOH system
			No. of molecules																			Probe radius=0.05 nm
		System #	PVC	ACE	MeOH	Total no. of molecules	Total MW(kg/mol)	Mol.f. PVC	Mol.f. ACE	Mol.f. MeOH	HE-Mixed (kJ)	HE-PVC (kJ)	HE-ACE (kJ)	HE-MeOH (kJ)	HE (kJ/mol)	VE-Mixed (nm3)	VE-PVC (nm3)	VE-ACE (nm3)	VE-MeOH (nm3)	VE (cm3/kg)	phi1	FH parameter	SASA-bulk (nm2)	SASA-solution (nm2)	SASA(solution/bulk)
		1	5	1378	0	1383	117.424	0.00361533	0.996385	0	-72434.6	7466.91	-77528.2	0	-1.71606	206.602	44.0298	174.415	0	-0.0439226	0.303337	-0.00164599	133.24	325.82	2.44536
		2	5	1102	499	1606	117.384	0.00311333	0.686177	0.31071	-45569.7	7466.91	-61996.2	9871.45	-0.567783	207.549	44.0298	132.485	33.283	-0.00718471	0.272603	-0.000521589	133.24	321.11	2.41001
		3	5	826	999	1830	117.376	0.00273224	0.451366	0.545902	-19556.6	7466.91	-46476.2	19760.5	-0.168202	208.251	44.0298	99.291	66.6158	-0.00472647	0.247423	-0.000149348	133.24	284.77	2.13727
		4	5	551	1499	2055	117.426	0.00243309	0.268127	0.72944	5842.63	7466.91	-30999.2	29654.3	-0.135951	208.605	44.0298	66.2434	99.9631	-0.00407165	0.226415	-0.000117434	133.24	256.59	1.92577
		5	5	276	1999	2280	117.476	0.00219298	0.121053	0.876754	31285	7466.91	-15534.4	39599.8	-0.108469	209.449	44.0298	33.1721	133.366	-0.00251606	0.208696	-9.15969e-05	133.24	243.56	1.82798
		6	10	1378	0	1388	154.924	0.00720461	0.992795	0	-66853.6	14883.8	-77528.2	0	-3.03256	248.394	88.8575	174.415	0	-0.0416739	0.465477	-0.00189553	277.34	581.72	2.0975
		7	10	1102	499	1611	154.884	0.00620732	0.684047	0.309745	-39915.5	14883.8	-61996.2	9871.45	-1.66018	249.53	88.8575	132.485	33.283	-0.0122998	0.428418	-0.00097043	277.34	552.23	1.99117
		8	10	826	999	1835	154.876	0.00544959	0.450136	0.544414	-13791.1	14883.8	-46476.2	19760.5	-1.06768	250.19	88.8575	99.291	66.6158	-0.00969432	0.396694	-0.000591279	277.34	512.15	1.84665
		9	10	551	1499	2060	154.926	0.00485437	0.267476	0.72767	12649.9	14883.8	-30999.2	29654.3	-0.431553	250.59	88.8575	66.2434	99.9631	-0.0084434	0.369231	-0.000228587	277.34	486.94	1.75575
		10	10	276	1999	2285	154.976	0.00437637	0.120788	0.874836	37813.4	14883.8	-15534.4	39599.8	-0.497068	251.742	88.8575	33.1721	133.366	-0.00621417	0.345324	-0.000253674	277.34	467.36	1.68515
		11	15	1378	0	1393	192.424	0.0107681	0.989232	0	-61923.6	22491.7	-77528.2	0	-4.94408	290.419	133.278	174.415	0	-0.0388146	0.566394	-0.00253972	412.93	858.26	2.07846
		12	15	1102	499	1616	192.384	0.00928218	0.681931	0.308787	-34486	22491.7	-61996.2	9871.45	-3.00306	291.485	133.278	132.485	33.283	-0.0146481	0.529256	-0.00142094	412.93	785.38	1.90197
		13	15	826	999	1840	192.376	0.00815217	0.448913	0.542935	-7970.05	22491.7	-46476.2	19760.5	-2.0359	292.56	133.278	99.291	66.6158	-0.0112724	0.496552	-0.000900735	412.93	729.47	1.76657
		14	15	551	1499	2065	192.426	0.00726392	0.266828	0.725908	18486.2	22491.7	-30999.2	29654.3	-1.28843	293.371	133.278	66.2434	99.9631	-0.00926657	0.467532	-0.000538968	412.93	718.39	1.73974
		15	15	276	1999	2290	192.476	0.00655022	0.120524	0.872926	44678.6	22491.7	-15534.4	39599.8	-0.820306	294.624	133.278	33.1721	133.366	-0.00709486	0.441718	-0.000327279	412.93	686.8	1.66324
		PVC-THF-MeOH system
			No. of molecules																				Probe radius=0.05 nm
		System #	PVC	THF	MeOH	Total no. of molecules	Total MW(kg/mol)	Mol.f. PVC	Mol.f. THF	Mol.f. MeOH	HE-Mixed (kJ)	HE-PVC (kJ)	HE-THF (kJ)	HE-MeOH (kJ)	HE (kJ/mol)	VE-Mixed (nm3)	VE-PVC (nm3)	VE-THF (nm3)	VE-MeOH (nm3)	VE (cm3/kg)	phi1	FH parameter	SASA-bulk (nm2)	SASA-solution (nm2)	SASA(solution/bulk)
		1	5	1109	0	1114	117.348	0.00448833	0.995512	0	94892.5	7466.91	89683.1	0	-2.02649	194.417	44.0298	153.777	0	-0.015618	0.351083	-0.00208676	133.24	318.75	2.3923
		2	5	886	499	1390	117.26	0.00359712	0.63741	0.358993	88800.3	7466.91	71612.8	9871.45	-0.108532	197.995	44.0298	122.676	33.283	-0.00736766	0.302267	-0.000103941	133.24	325.72	2.44461
		3	5	664	999	1668	117.276	0.0029976	0.398082	0.598921	81041.6	7466.91	53689.1	19760.5	0.074994	201.017	44.0298	92.054	66.6158	-0.0051807	0.265135	6.81925e-05	133.24	309.42	2.32228
		4	5	443	1499	1947	117.364	0.00256805	0.22753	0.769902	73081.1	7466.91	35806.7	29654.3	0.07868	203.743	44.0298	61.3505	99.9631	-0.00421833	0.236035	6.8819e-05	133.24	285.11	2.13982
		5	5	222	1999	2226	117.452	0.00224618	0.0997305	0.898023	64673.8	7466.91	17941.2	39599.8	-0.150094	206.373	44.0298	30.7416	133.366	-0.00406466	0.212691	-0.00012739	133.24	262.67	1.9714
		6	10	1109	0	1119	154.848	0.00893655	0.991063	0	100408	14883.8	89683.1	0	-3.71662	235.894	88.8575	153.777	0	-0.0234298	0.519706	-0.0025854	277.34	561.94	2.02618
		7	10	886	499	1395	154.76	0.00716846	0.635125	0.357706	94429.5	14883.8	71612.8	9871.45	-1.38964	239.667	88.8575	122.676	33.283	-0.0143663	0.464217	-0.000866565	277.34	587.67	2.11895
		8	10	664	999	1673	154.776	0.00597729	0.396892	0.597131	86952.3	14883.8	53689.1	19760.5	-0.825523	242.857	88.8575	92.054	66.6158	-0.0108632	0.419141	-0.000474838	277.34	576.23	2.0777
		9	10	443	1499	1952	154.864	0.00512295	0.226947	0.76793	78723.8	14883.8	35806.7	29654.3	-0.83043	245.441	88.8575	61.3505	99.9631	-0.00942438	0.381922	-0.000448898	277.34	515.27	1.8579
		10	10	222	1999	2231	154.952	0.00448229	0.0995069	0.896011	70915.3	14883.8	17941.2	39599.8	-0.676602	248.526	88.8575	30.7416	133.366	-0.00773412	0.350775	-0.000348197	277.34	495.05	1.78499
		11	15	1109	0	1124	192.348	0.0133452	0.986655	0	106318	22491.7	89683.1	0	-5.21068	277.964	133.278	153.777	0	-0.0253262	0.618769	-0.00304441	412.93	801.3	1.94052
		12	15	886	499	1400	192.26	0.0107143	0.632857	0.356429	100312	22491.7	71612.8	9871.45	-2.61711	281.75	133.278	122.676	33.283	-0.0167534	0.565149	-0.00134053	412.93	814.81	1.97324
		13	15	664	999	1678	192.276	0.00893921	0.395709	0.595352	92571.6	22491.7	53689.1	19760.5	-2.00816	284.665	133.278	92.054	66.6158	-0.0135955	0.519781	-0.000931442	412.93	796.3	1.92841
		14	15	443	1499	1957	192.364	0.00766479	0.226367	0.765968	85238.7	22491.7	35806.7	29654.3	-1.38682	288.294	133.278	61.3505	99.9631	-0.0100757	0.481026	-0.000595209	412.93	780.8	1.89088
		15	15	222	1999	2236	192.452	0.00670841	0.0992844	0.894007	77459.5	22491.7	17941.2	39599.8	-1.15081	291.319	133.278	30.7416	133.366	-0.0084911	0.44765	-0.00046407	412.93	710.48	1.72058
		HSP Distance between PVC and mixture (MPa1/2)
		MeOH wt %	Ra (ACE-MeOH)	Ra (THF-MeOH)
		0	2.69	2.21
		10	9.06	2.57
		20	12.11	6.69
		30	13.51	8.67
		40	14.84	10.65
		50	16.15	12.69
		60	17.4	14.85
		80	19.08	17.52
